# Supplementary material for: Thymopoiesis independent of common lymphoid progenitors
Source: Springer Nature journal article supplement (doi:10.1038/ni878), 2003-01-06
Supplement: 41590_2003_BFni878_MOESM1_ESM.pdf [file 41590_2003_BFni878_MOESM1_ESM.pdf]

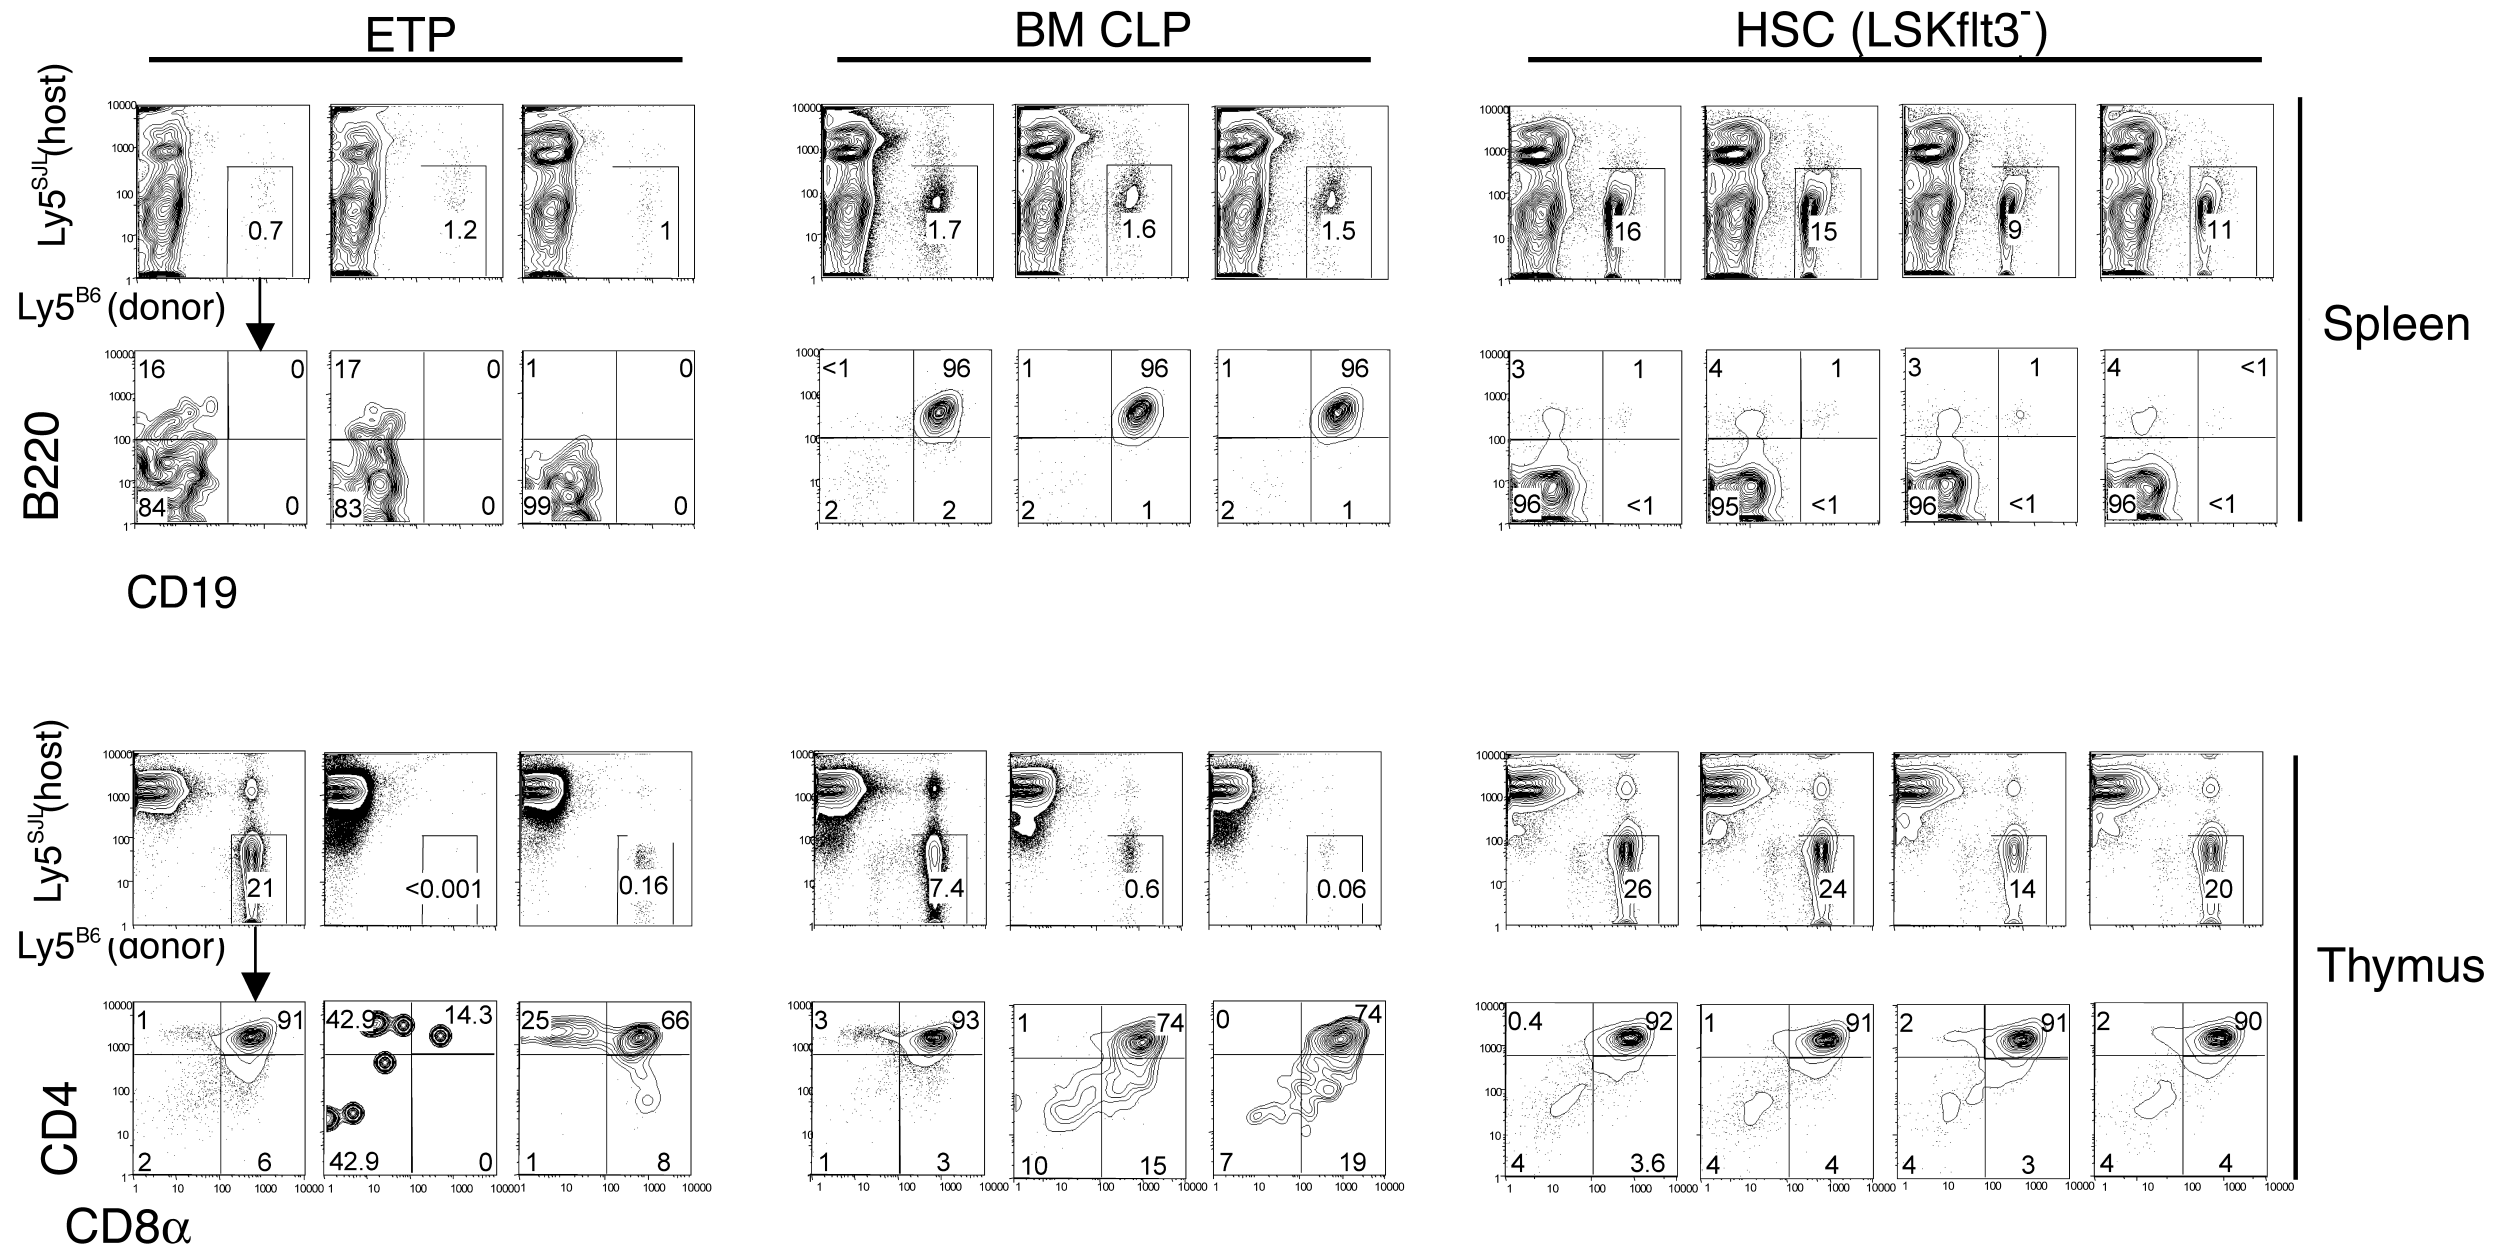

**Supplementary Figure 1.** Reconstitution in spleen and thymus of irradiated mice. ETPs, BM CLPs and LSKflt3<sup>-</sup> HSCs were intravenously inoculated into groups of lethally irradiated B6.Ly5SjL mice. Each column of 4 panels is derived from spleen (top two rows) and thymus (bottom two rows) of individual mice that were intravenously reconstituted with  $2 \times 10^3$  cells of the indicated progenitor populations 16 days earlier, along with  $2 \times 10^5$  host-type BM cells. Numbers on plots are the frequency of cells lying within the indicated regions. Splenic reconstitution is consistent between mice given the same donor populations. Thymic reconstitution by HSCs is also consistent, but thymic reconstitution by ETPs and BM CLPs is inconsistent. LSKflt3<sup>+</sup> BM progenitors were not examined in this experiment.
